# Supplementary material for: Intake of individual saturated fatty acids and risk of coronary heart disease in US men and women: two prospective longitudinal cohort studies
Source: PubMed Central journal article supplement — BMJ. 2016 Nov 23;355:i5796. doi: 10.1136/bmj.i5796 (PMC5121105; doi:10.1136/bmj.i5796), 2016-11-23
Supplement: zong033680.ww_default.pdf [file zong033680.ww_default.pdf]

**Appendix: Supplementary tables**

**Supplementary table 1.** Spearman correlations among individual saturated fatty acids

|                 | <b>NHS</b>  |             |             |             | <b>HPFS</b> |             |             |             |
|-----------------|-------------|-------------|-------------|-------------|-------------|-------------|-------------|-------------|
|                 | <b>12:0</b> | <b>14:0</b> | <b>16:0</b> | <b>18:0</b> | <b>12:0</b> | <b>14:0</b> | <b>16:0</b> | <b>18:0</b> |
| <b>4:0-10:0</b> | 0.82        | 0.91        | 0.46        | 0.38        | 0.84        | 0.90        | 0.48        | 0.41        |
| <b>12:0</b>     |             | 0.82        | 0.44        | 0.45        |             | 0.81        | 0.46        | 0.43        |
| <b>14:0</b>     |             |             | 0.70        | 0.65        |             |             | 0.75        | 0.67        |
| <b>16:0</b>     |             |             |             | 0.93        |             |             |             | 0.92        |

All P values <0.001.

**Supplementary table 2.** Stratified analysis of associations between saturated fatty acids and CHD risk in NHS (1984-2012) and HPFS (1986-2010). \*

|                                     |           | <b>Hazard ratio of CHD</b>    |          |                            |          | <b>P</b>           |
|-------------------------------------|-----------|-------------------------------|----------|----------------------------|----------|--------------------|
|                                     |           | <b>Age</b>                    |          |                            |          | <b>interaction</b> |
|                                     |           | <b>&lt;65yrs</b>              | <b>P</b> | <b>≥65yrs</b>              | <b>P</b> |                    |
| Polyunsaturated fat to replace      | 12:0-14:0 | 0.91 (0.77, 1.08)             | 0.28     | 1.10 (0.96, 1.27)          | 0.18     | 0.82               |
|                                     | 16:0      | 0.97 (0.84, 1.11)             | 0.63     | 0.82 (0.74, 0.92)          | <0.001   | 0.79               |
|                                     | 18:0      | 0.92 (0.79, 1.07)             | 0.27     | 0.91 (0.81, 1.02)          | 0.11     | 0.84               |
|                                     | 12:0-18:0 | 0.93 (0.87, 0.98)             | 0.01     | 0.92 (0.88, 0.96)          | <0.001   | 0.82               |
| Monounsaturated fat to replace      | 12:0-14:0 | 0.97 (0.83, 1.13)             | 0.65     | 1.15 (1.01, 1.31)          | 0.03     | 0.48               |
|                                     | 16:0      | 1.02 (0.87, 1.20)             | 0.81     | 0.86 (0.76, 0.97)          | 0.02     | 0.44               |
|                                     | 18:0      | 0.97 (0.81, 1.15)             | 0.70     | 0.96 (0.84, 1.09)          | 0.55     | 0.49               |
|                                     | 12:0-18:0 | 0.96 (0.87, 1.05)             | 0.36     | 0.95 (0.89, 1.01)          | 0.11     | 0.40               |
| Whole-grain carbohydrate to replace | 12:0-14:0 | 0.92 (0.78, 1.09)             | 0.35     | 1.13 (0.98, 1.30)          | 0.09     | 0.57               |
|                                     | 16:0      | 0.98 (0.86, 1.11)             | 0.75     | 0.85 (0.77, 0.94)          | 0.001    | 0.61               |
|                                     | 18:0      | 0.93 (0.80, 1.09)             | 0.36     | 0.93 (0.82, 1.04)          | 0.21     | 0.56               |
|                                     | 12:0-18:0 | 0.94 (0.89, 0.99)             | 0.03     | 0.94 (0.90, 0.98)          | 0.002    | 0.62               |
| Plant protein to replace            | 12:0-14:0 | 0.94 (0.79, 1.12)             | 0.52     | 1.10 (0.95, 1.27)          | 0.19     | 0.36               |
|                                     | 16:0      | 1.00 (0.88, 1.15)             | 0.96     | 0.83 (0.75, 0.92)          | <0.001   | 0.33               |
|                                     | 18:0      | 0.95 (0.81, 1.11)             | 0.51     | 0.90 (0.80, 1.02)          | 0.10     | 0.37               |
|                                     | 12:0-18:0 | 0.96 (0.89, 1.03)             | 0.24     | 0.91 (0.86, 0.96)          | 0.001    | 0.33               |
|                                     |           | <b>BMI</b>                    |          |                            |          |                    |
|                                     |           | <b>&lt;30kg/m<sup>2</sup></b> | <b>P</b> | <b>≥30kg/m<sup>2</sup></b> | <b>P</b> |                    |
| Polyunsaturated fat to replace      | 12:0-14:0 | 1.04 (0.92, 1.17)             | 0.53     | 0.89 (0.68, 1.16)          | 0.38     | 0.69               |
|                                     | 16:0      | 0.88 (0.80, 0.97)             | 0.01     | 0.91 (0.74, 1.13)          | 0.41     | 0.70               |
|                                     | 18:0      | 0.93 (0.84, 1.03)             | 0.15     | 0.90 (0.72, 1.12)          | 0.33     | 0.67               |
|                                     | 12:0-18:0 | 0.93 (0.90, 0.97)             | 0.001    | 0.89 (0.82, 0.97)          | 0.01     | 0.69               |
| Monounsaturated fat to replace      | 12:0-14:0 | 1.09 (0.97, 1.22)             | 0.14     | 0.98 (0.77, 1.25)          | 0.87     | 0.69               |
|                                     | 16:0      | 0.92 (0.83, 1.03)             | 0.14     | 1.00 (0.78, 1.28)          | >0.99    | 0.73               |
|                                     | 18:0      | 0.98 (0.87, 1.10)             | 0.71     | 0.97 (0.75, 1.26)          | 0.83     | 0.68               |
|                                     | 12:0-18:0 | 0.96 (0.91, 1.02)             | 0.24     | 0.94 (0.82, 1.08)          | 0.38     | 0.75               |
| Whole-grain carbohydrate to replace | 12:0-14:0 | 1.06 (0.94, 1.20)             | 0.34     | 0.90 (0.69, 1.17)          | 0.44     | 0.52               |
|                                     | 16:0      | 0.90 (0.83, 0.99)             | 0.02     | 0.94 (0.77, 1.14)          | 0.52     | 0.53               |
|                                     | 18:0      | 0.94 (0.85, 1.05)             | 0.28     | 0.91 (0.72, 1.15)          | 0.42     | 0.52               |
|                                     | 12:0-18:0 | 0.95 (0.92, 0.99)             | 0.01     | 0.91 (0.84, 0.99)          | 0.02     | 0.54               |
| Plant protein to replace            | 12:0-14:0 | 1.04 (0.92, 1.18)             | 0.54     | 0.97 (0.74, 1.28)          | 0.83     | 0.38               |
|                                     | 16:0      | 0.88 (0.81, 0.97)             | 0.01     | 1.00 (0.81, 1.24)          | 0.97     | 0.37               |
|                                     | 18:0      | 0.92 (0.83, 1.03)             | 0.13     | 0.98 (0.77, 1.24)          | 0.86     | 0.38               |
|                                     | 12:0-18:0 | 0.93 (0.89, 0.97)             | 0.002    | 0.97 (0.87, 1.08)          | 0.60     | 0.37               |
|                                     |           | <b>Physical activity</b>      |          |                            |          |                    |
|                                     |           | <b>&lt;18 METs/wk</b>         | <b>P</b> | <b>≥18 METs/wk</b>         | <b>P</b> |                    |
| Polyunsaturated fat                 | 12:0-14:0 | 0.96 (0.84, 1.09)             | 0.50     | 1.17 (0.96, 1.44)          | 0.13     | 0.61               |

|                                     |           |                   |        |                   |      |      |
|-------------------------------------|-----------|-------------------|--------|-------------------|------|------|
| to replace                          | 16:0      | 0.89 (0.80, 0.99) | 0.03   | 0.82 (0.71, 0.96) | 0.01 | 0.59 |
|                                     | 18:0      | 0.94 (0.84, 1.05) | 0.28   | 0.90 (0.76, 1.06) | 0.19 | 0.62 |
|                                     | 12:0-18:0 | 0.92 (0.88, 0.96) | <0.001 | 0.92 (0.87, 0.98) | 0.01 | 0.60 |
| Monounsaturated fat to replace      | 12:0-14:0 | 1.02 (0.91, 1.15) | 0.74   | 1.21 (1.00, 1.46) | 0.05 | 0.63 |
|                                     | 16:0      | 0.94 (0.83, 1.06) | 0.33   | 0.84 (0.71, 1.00) | 0.05 | 0.62 |
|                                     | 18:0      | 1.00 (0.88, 1.14) | 0.98   | 0.93 (0.78, 1.12) | 0.45 | 0.63 |
| Whole-grain carbohydrate to replace | 12:0-18:0 | 0.96 (0.90, 1.03) | 0.29   | 0.93 (0.85, 1.02) | 0.12 | 0.59 |
|                                     | 12:0-14:0 | 0.98 (0.86, 1.12) | 0.77   | 1.18 (0.96, 1.45) | 0.11 | 0.40 |
|                                     | 16:0      | 0.91 (0.83, 1.01) | 0.08   | 0.83 (0.73, 0.96) | 0.01 | 0.40 |
| Plant protein to replace            | 18:0      | 0.96 (0.85, 1.08) | 0.51   | 0.90 (0.76, 1.06) | 0.21 | 0.40 |
|                                     | 12:0-18:0 | 0.94 (0.90, 0.98) | 0.01   | 0.92 (0.87, 0.98) | 0.01 | 0.40 |
|                                     | 12:0-14:0 | 0.97 (0.85, 1.11) | 0.69   | 1.18 (0.96, 1.46) | 0.12 | 0.65 |
| Plant protein to replace            | 16:0      | 0.91 (0.82, 1.01) | 0.07   | 0.83 (0.72, 0.96) | 0.01 | 0.66 |
|                                     | 18:0      | 0.95 (0.84, 1.08) | 0.44   | 0.89 (0.76, 1.06) | 0.20 | 0.65 |
|                                     | 12:0-18:0 | 0.93 (0.88, 0.99) | 0.01   | 0.92 (0.86, 0.99) | 0.02 | 0.67 |

| <b>Current smoking</b>              |           |                   |          |                   |          |      |
|-------------------------------------|-----------|-------------------|----------|-------------------|----------|------|
|                                     |           | No                | <i>P</i> | Yes               | <i>P</i> |      |
| Polyunsaturated fat to replace      | 12:0-14:0 | 1.02 (0.90, 1.15) | 0.77     | 1.04 (0.81, 1.33) | 0.76     | 0.19 |
|                                     | 16:0      | 0.87 (0.80, 0.96) | 0.004    | 0.92 (0.75, 1.14) | 0.46     | 0.20 |
|                                     | 18:0      | 0.91 (0.83, 1.01) | 0.08     | 0.99 (0.78, 1.26) | 0.96     | 0.18 |
|                                     | 12:0-18:0 | 0.92 (0.88, 0.95) | <0.001   | 0.98 (0.90, 1.08) | 0.74     | 0.20 |
| Monounsaturated fat to replace      | 12:0-14:0 | 1.08 (0.96, 1.21) | 0.19     | 1.00 (0.81, 1.25) | 0.99     | 0.93 |
|                                     | 16:0      | 0.92 (0.82, 1.02) | 0.12     | 0.90 (0.69, 1.16) | 0.42     | 0.94 |
|                                     | 18:0      | 0.97 (0.86, 1.08) | 0.56     | 0.97 (0.73, 1.31) | 0.86     | 0.94 |
|                                     | 12:0-18:0 | 0.95 (0.89, 1.01) | 0.08     | 0.96 (0.82, 1.13) | 0.64     | 0.96 |
| Whole-grain carbohydrate to replace | 12:0-14:0 | 1.04 (0.92, 1.17) | 0.55     | 1.03 (0.81, 1.31) | 0.80     | 0.44 |
|                                     | 16:0      | 0.89 (0.82, 0.97) | 0.01     | 0.92 (0.75, 1.13) | 0.43     | 0.44 |
|                                     | 18:0      | 0.93 (0.84, 1.03) | 0.15     | 0.99 (0.77, 1.27) | 0.93     | 0.44 |
|                                     | 12:0-18:0 | 0.93 (0.90, 0.97) | <0.001   | 0.98 (0.89, 1.07) | 0.60     | 0.43 |
| Plant protein to replace            | 12:0-14:0 | 1.03 (0.91, 1.17) | 0.63     | 1.01 (0.78, 1.30) | 0.95     | 0.72 |
|                                     | 16:0      | 0.89 (0.81, 0.97) | 0.01     | 0.90 (0.73, 1.12) | 0.35     | 0.71 |
|                                     | 18:0      | 0.92 (0.83, 1.02) | 0.13     | 0.96 (0.74, 1.25) | 0.78     | 0.72 |
|                                     | 12:0-18:0 | 0.93 (0.88, 0.97) | 0.001    | 0.96 (0.85, 1.08) | 0.48     | 0.75 |

\*, Other covariates adjusted were the same as figure 2.

**Supplementary table 3.** Associations between individual saturated fatty acids and CHD risk in NHS (1984-2012) and HPFS (1986-2010)

adjusting for baseline BMI as a covariate. \*

|                                           |           | Hazard ratio of CHD |          |                   |          |                     |          |
|-------------------------------------------|-----------|---------------------|----------|-------------------|----------|---------------------|----------|
|                                           |           | NHS                 | <i>P</i> | HPFS              | <i>P</i> | Pooled <sup>5</sup> | <i>P</i> |
| Polyunsaturated fat<br>to replace         | 12:0-14:0 | 0.99 (0.83, 1.18)   | 0.88     | 1.02 (0.88, 1.16) | 0.83     | 1.00 (0.90, 1.12)   | 0.94     |
|                                           | 16:0      | 0.87 (0.76, 1.00)   | 0.05     | 0.91 (0.82, 1.01) | 0.07     | 0.89 (0.82, 0.97)   | 0.01     |
|                                           | 18:0      | 0.84 (0.72, 0.99)   | 0.03     | 0.98 (0.88, 1.09) | 0.70     | 0.93 (0.85, 1.02)   | 0.12     |
|                                           | 12:0-18:0 | 0.89 (0.84, 0.94)   | <0.001   | 0.96 (0.92, 1.00) | 0.05     | 0.93 (0.90, 0.96)   | <0.001   |
| Monounsaturated fat<br>to replace         | 12:0-14:0 | 1.05 (0.89, 1.23)   | 0.57     | 1.07 (0.94, 1.21) | 0.32     | 1.06 (0.96, 1.17)   | 0.25     |
|                                           | 16:0      | 0.92 (0.79, 1.08)   | 0.32     | 0.94 (0.83, 1.07) | 0.37     | 0.94 (0.85, 1.03)   | 0.19     |
|                                           | 18:0      | 0.89 (0.74, 1.07)   | 0.21     | 1.03 (0.91, 1.17) | 0.63     | 0.98 (0.88, 1.09)   | 0.74     |
|                                           | 12:0-18:0 | 0.92 (0.84, 1.00)   | 0.05     | 0.99 (0.93, 1.06) | 0.82     | 0.96 (0.91, 1.02)   | 0.17     |
| Whole-grain<br>carbohydrate to<br>replace | 12:0-14:0 | 1.03 (0.87, 1.23)   | 0.71     | 1.02 (0.89, 1.17) | 0.74     | 1.03 (0.92, 1.14)   | 0.63     |
|                                           | 16:0      | 0.92 (0.81, 1.04)   | 0.18     | 0.92 (0.83, 1.01) | 0.09     | 0.92 (0.85, 0.99)   | 0.03     |
|                                           | 18:0      | 0.88 (0.74, 1.03)   | 0.12     | 0.99 (0.88, 1.10) | 0.80     | 0.95 (0.86, 1.04)   | 0.27     |
|                                           | 12:0-18:0 | 0.93 (0.88, 0.98)   | 0.01     | 0.96 (0.92, 1.00) | 0.08     | 0.95 (0.92, 0.98)   | 0.002    |
| Plant protein to<br>replace               | 12:0-14:0 | 1.04 (0.87, 1.25)   | 0.64     | 1.00 (0.86, 1.15) | 0.96     | 1.01 (0.91, 1.13)   | 0.81     |
|                                           | 16:0      | 0.92 (0.81, 1.06)   | 0.25     | 0.89 (0.80, 0.99) | 0.03     | 0.90 (0.83, 0.98)   | 0.02     |
|                                           | 18:0      | 0.89 (0.75, 1.05)   | 0.16     | 0.96 (0.85, 1.08) | 0.49     | 0.94 (0.85, 1.03)   | 0.17     |
|                                           | 12:0-18:0 | 0.93 (0.87, 1.00)   | 0.05     | 0.94 (0.89, 0.99) | 0.01     | 0.93 (0.90, 0.98)   | 0.002    |

\*, Other covariates adjusted were the same as figure 2.

**Supplementary table 4.** Associations between individual saturated fatty acids and CHD risk in NHS (1984-2012) and HPFS (1986-2010) adjusting for incident hypercholesterolemia, hypertension and diabetes during the follow-up. \*

|                                           |           | Hazard ratio of CHD |          |                   |          |                     |          |
|-------------------------------------------|-----------|---------------------|----------|-------------------|----------|---------------------|----------|
|                                           |           | NHS                 | <i>P</i> | HPFS              | <i>P</i> | Pooled <sup>5</sup> | <i>P</i> |
| Polyunsaturated fat<br>to replace         | 12:0-14:0 | 0.98 (0.82, 1.16)   | 0.80     | 1.03 (0.89, 1.18) | 0.71     | 1.01 (0.90, 1.12)   | 0.89     |
|                                           | 16:0      | 0.89 (0.78, 1.02)   | 0.09     | 0.89 (0.80, 0.99) | 0.03     | 0.89 (0.82, 0.96)   | 0.005    |
|                                           | 18:0      | 0.85 (0.72, 0.99)   | 0.04     | 0.97 (0.87, 1.09) | 0.62     | 0.93 (0.85, 1.02)   | 0.12     |
|                                           | 12:0-18:0 | 0.89 (0.84, 0.95)   | <0.001   | 0.95 (0.91, 0.99) | 0.02     | 0.93 (0.90, 0.96)   | <0.001   |
| Monounsaturated<br>fat to replace         | 12:0-14:0 | 1.04 (0.89, 1.22)   | 0.61     | 1.07 (0.95, 1.22) | 0.27     | 1.06 (0.96, 1.17)   | 0.24     |
|                                           | 16:0      | 0.95 (0.81, 1.11)   | 0.50     | 0.92 (0.81, 1.04) | 0.20     | 0.93 (0.84, 1.03)   | 0.15     |
|                                           | 18:0      | 0.90 (0.75, 1.08)   | 0.26     | 1.02 (0.90, 1.16) | 0.71     | 0.98 (0.88, 1.09)   | 0.73     |
|                                           | 12:0-18:0 | 0.94 (0.86, 1.02)   | 0.13     | 0.98 (0.92, 1.05) | 0.64     | 0.96 (0.91, 1.02)   | 0.20     |
| Whole-grain<br>carbohydrate to<br>replace | 12:0-14:0 | 1.03 (0.87, 1.23)   | 0.73     | 1.03 (0.90, 1.19) | 0.62     | 1.03 (0.93, 1.15)   | 0.55     |
|                                           | 16:0      | 0.94 (0.83, 1.07)   | 0.34     | 0.90 (0.81, 0.99) | 0.03     | 0.91 (0.84, 0.99)   | 0.02     |
|                                           | 18:0      | 0.89 (0.76, 1.05)   | 0.17     | 0.98 (0.88, 1.10) | 0.73     | 0.95 (0.87, 1.04)   | 0.29     |
|                                           | 12:0-18:0 | 0.94 (0.89, 0.99)   | 0.03     | 0.96 (0.92, 1.00) | 0.04     | 0.95 (0.92, 0.98)   | 0.003    |
| Plant protein to<br>replace               | 12:0-14:0 | 1.05 (0.87, 1.25)   | 0.63     | 1.01 (0.88, 1.16) | 0.88     | 1.02 (0.92, 1.14)   | 0.68     |
|                                           | 16:0      | 0.95 (0.83, 1.09)   | 0.48     | 0.88 (0.79, 0.97) | 0.01     | 0.90 (0.83, 0.98)   | 0.02     |
|                                           | 18:0      | 0.90 (0.76, 1.07)   | 0.24     | 0.96 (0.85, 1.08) | 0.46     | 0.94 (0.85, 1.03)   | 0.20     |
|                                           | 12:0-18:0 | 0.95 (0.89, 1.02)   | 0.17     | 0.93 (0.89, 0.98) | 0.01     | 0.94 (0.90, 0.98)   | 0.004    |

\*, Other covariates adjusted were the same as figure 2.

**Supplementary table 5.** Associations between individual saturated fatty acids and CHD risk in NHS (1984-2012) and HPFS (1986-2010) after excluding participants with probable fatal CHD. \*

|                                           |           | <b>Hazard ratio of CHD</b> |          |                   |          |                           |          |
|-------------------------------------------|-----------|----------------------------|----------|-------------------|----------|---------------------------|----------|
|                                           |           | <b>NHS</b>                 | <b>P</b> | <b>HPFS</b>       | <b>P</b> | <b>Pooled<sup>5</sup></b> | <b>P</b> |
| Substitution of PUFA                      | 12:0-14:0 | 0.98 (0.81, 1.18)          | 0.81     | 1.12 (0.96, 1.31) | 0.14     | 1.06 (0.94, 1.19)         | 0.32     |
|                                           | 16:0      | 0.87 (0.75, 1.00)          | 0.05     | 0.88 (0.79, 0.99) | 0.03     | 0.88 (0.80, 0.96)         | 0.003    |
|                                           | 18:0      | 0.87 (0.74, 1.03)          | 0.10     | 0.93 (0.83, 1.04) | 0.18     | 0.91 (0.83, 1.00)         | 0.04     |
|                                           | 12:0-18:0 | 0.89 (0.84, 0.95)          | <0.001   | 0.95 (0.90, 0.99) | 0.02     | 0.93 (0.89, 0.96)         | <0.001   |
| Substitution of MUFA                      | 12:0-14:0 | 1.03 (0.87, 1.22)          | 0.70     | 1.16 (1.01, 1.33) | 0.04     | 1.11 (0.99, 1.23)         | 0.07     |
|                                           | 16:0      | 0.91 (0.77, 1.08)          | 0.28     | 0.91 (0.80, 1.04) | 0.17     | 0.91 (0.82, 1.01)         | 0.08     |
|                                           | 18:0      | 0.92 (0.76, 1.11)          | 0.37     | 0.97 (0.85, 1.10) | 0.61     | 0.95 (0.85, 1.06)         | 0.35     |
|                                           | 12:0-18:0 | 0.92 (0.84, 1.01)          | 0.07     | 0.97 (0.90, 1.05) | 0.44     | 0.95 (0.90, 1.01)         | 0.08     |
| Substitution of whole grain carbohydrates | 12:0-14:0 | 1.01 (0.84, 1.21)          | 0.93     | 1.12 (0.96, 1.30) | 0.15     | 1.07 (0.95, 1.20)         | 0.24     |
|                                           | 16:0      | 0.90 (0.78, 1.03)          | 0.12     | 0.88 (0.79, 0.98) | 0.02     | 0.89 (0.82, 0.97)         | 0.01     |
|                                           | 18:0      | 0.89 (0.75, 1.06)          | 0.20     | 0.92 (0.82, 1.04) | 0.17     | 0.91 (0.83, 1.00)         | 0.06     |
|                                           | 12:0-18:0 | 0.92 (0.87, 0.97)          | 0.003    | 0.94 (0.90, 0.99) | 0.01     | 0.93 (0.90, 0.97)         | <0.001   |
| Substitution of plant proteins            | 12:0-14:0 | 1.04 (0.86, 1.26)          | 0.68     | 1.10 (0.94, 1.28) | 0.24     | 1.08 (0.95, 1.21)         | 0.24     |
|                                           | 16:0      | 0.93 (0.80, 1.07)          | 0.30     | 0.87 (0.78, 0.97) | 0.01     | 0.89 (0.81, 0.97)         | 0.01     |
|                                           | 18:0      | 0.92 (0.77, 1.10)          | 0.38     | 0.90 (0.80, 1.02) | 0.10     | 0.91 (0.82, 1.01)         | 0.06     |
|                                           | 12:0-18:0 | 0.94 (0.88, 1.02)          | 0.13     | 0.93 (0.88, 0.98) | 0.01     | 0.93 (0.89, 0.97)         | 0.002    |

\*, Other covariates adjusted were the same as figure 2.
